# Supplementary material for: Lateral Cephalometric Analytical Uses for Temporomandibular Joint Disorders: The Importance of Cervical Posture and Hyoid Position
Source: MDPI journal article supplement (doi:10.3390/ijerph191711077), 2022-09-04
Supplement: s1 [file s1]

**Table S1.** Risk of bias summary for non-RCTs Non-randomized Study of Intervention (NRS): review authors' judgements about each risk of bias item for each included study.

| STUDY TYPE: NRS                    |                                                                                                                                                                                                   |                                                                                                                         |                                         |                                                   |                                                   |                                                                                           |                                                                 |          |
|------------------------------------|---------------------------------------------------------------------------------------------------------------------------------------------------------------------------------------------------|-------------------------------------------------------------------------------------------------------------------------|-----------------------------------------|---------------------------------------------------|---------------------------------------------------|-------------------------------------------------------------------------------------------|-----------------------------------------------------------------|----------|
| Author (Year)                      | Bias Due To Confounding (Other Factors Such As Osteoarthritis, Rheumatoid Arthritis, History Of Injury Of The Jaw, History Of Bruxism, Connective Tissue Disease, Previous Orthodontic Treatment) | Bias In Selection Of Participants Into Study                                                                            | Bias In Classification Of Interventions | Bias Due To Deviations From Intended Intervention | Bias Due To Missing Data                          | Bias In Measurement Of Outcomes                                                           | Bias In Selection Of The Reported Result                        | Overall  |
| 1. (Huggare and Raustia 1992) [14] | Critical<br>No data regarding confounding variables.                                                                                                                                              | SERIOUS<br>No consecutive patients.<br>No period of inclusion was stated.                                               | LOW<br>Treatment clearly stated.        | LOW<br>No co-interventions                        | Serious<br>No follow-up period was stated.        | Moderate<br>Used Helkimo index.<br>No masking strategy specified.                         | LOW<br>Clinical and radiological assessment is well documented. | Critical |
| 2. (Moya et al. 1994) [17]         | Critical<br>No data regarding confounding variables.                                                                                                                                              | SERIOUS<br>No consecutive patients.<br>No period of inclusion was stated.                                               | LOW<br>Treatment clearly stated.        | LOW<br>No co-interventions                        | LOW<br>No missing data.                           | Moderate<br>No masking strategy specified.                                                | LOW<br>Clinical and radiological assessment is well documented. | Critical |
| 3. (Santa nder et al. 2014) [21]   | LOW<br>All variables were clearly stated and investigated.                                                                                                                                        | Moderate<br>Patients included were not consecutive.<br>It excludes male patients.<br>No period of inclusion was stated. | LOW<br>Treatment clearly stated.        | LOW<br>No co-interventions                        | LOW<br>No missing data.                           | Moderate<br>No masking strategy specified.                                                | LOW<br>Clinical and radiological assessment is well documented. | Moderate |
| 4. (Kang 2020a) [18]               | LOW<br>All variables were clearly stated and investigated.                                                                                                                                        | LOW<br>No bias in selection of participants.                                                                            | LOW<br>Treatment clearly stated.        | LOW<br>No co-interventions                        | LOW<br>No losses of information across the study. | Moderate<br>No masking strategy specified.<br>Inter-investigator reliability was checked. | LOW<br>Clinical and radiological assessment is well documented. | Moderate |
| 5. (Kang 2020b) [19]               | Serious<br>Inclusion of patients with osteoarthritis.                                                                                                                                             | Low<br>No bias in selection of participants.                                                                            | LOW<br>Treatment clearly stated.        | LOW<br>No co-interventions                        | Low<br>No losses of information across the study. | Modetate<br>No masking strategy specified.<br>Inter-investigator                          | LOW<br>Clinical and radiological assessment is well documented. | Serious  |

| reliability was checked. |                        |                                                            |                                              |                                  |                            |                                                   |                                            |                                                                 |          |
|--------------------------|------------------------|------------------------------------------------------------|----------------------------------------------|----------------------------------|----------------------------|---------------------------------------------------|--------------------------------------------|-----------------------------------------------------------------|----------|
| 6.                       | (Kim et al. 2020) [20] | LOW<br>All variables were clearly stated and investigated. | LOW<br>No bias in selection of participants. | LOW<br>Treatment clearly stated. | LOW<br>No co-interventions | LOW<br>No losses of information across the study. | Moderate<br>No masking strategy specified. | LOW<br>Clinical and radiological assessment is well documented. | Moderate |
